# Supplementary material
Source: PubMed Central journal article supplement (PMC5546988)
Supplement: NIHMS889238-supplement-Supp_FigS1.pdf [file NIHMS889238-supplement-Supp_FigS1.pdf]

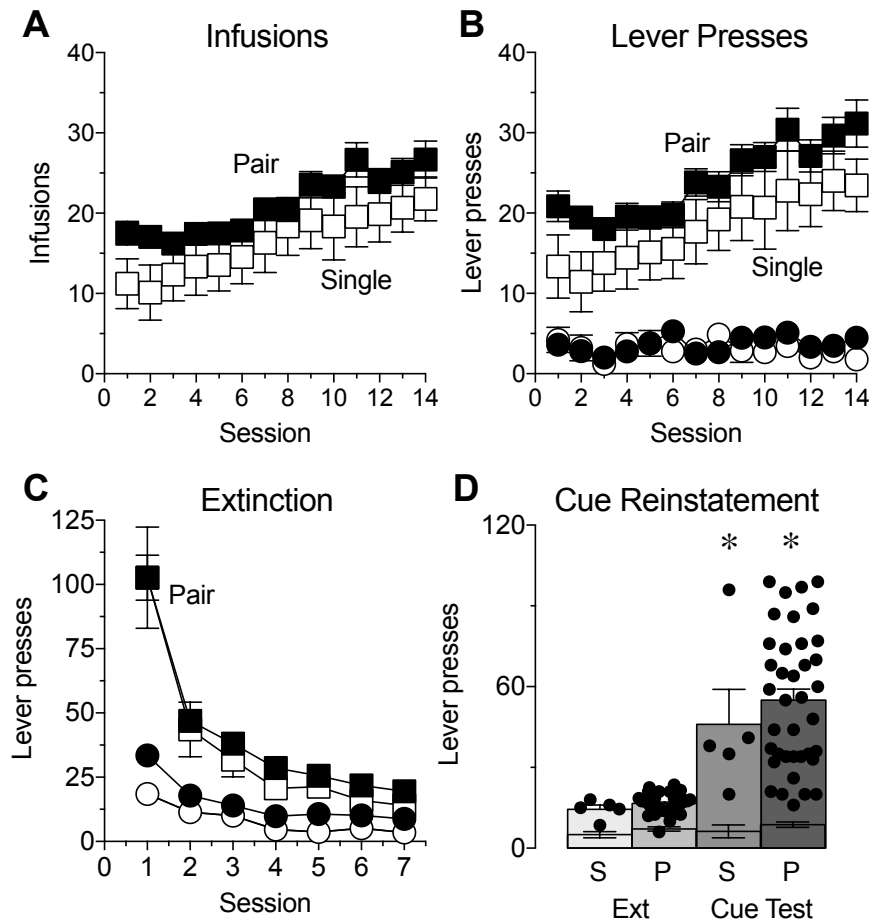

**Figure S1. Self-administration and reinstatement of cocaine-seeking does not differ across housing conditions. (A,B)** Number of infusions earned (A) and active (squares) and inactive (circles) lever presses (B) during 14 sessions of intermittent access to cocaine self-administration in pair-housed (black symbols; N=38) and single-housed (white symbols; N=5) rats. **(C)** Number of active (squares) and inactive (circles) lever presses during the first 7 days of extinction in pair-housed (black symbols) and single-housed (white symbols) rats. **(D)** Active (bars and dots) and inactive (lower error bars) lever presses during extinction (Ext) and a cue-induced reinstatement test in pair-housed (P) and single-housed (S) rats. Data

represent mean  $\pm$  SEM.
